# Supplementary material
Source: PubMed Central journal article supplement (PMC10805032)
Supplement: jvi.01618-23-s0001.pdf [file jvi.01618-23-s0001.pdf]

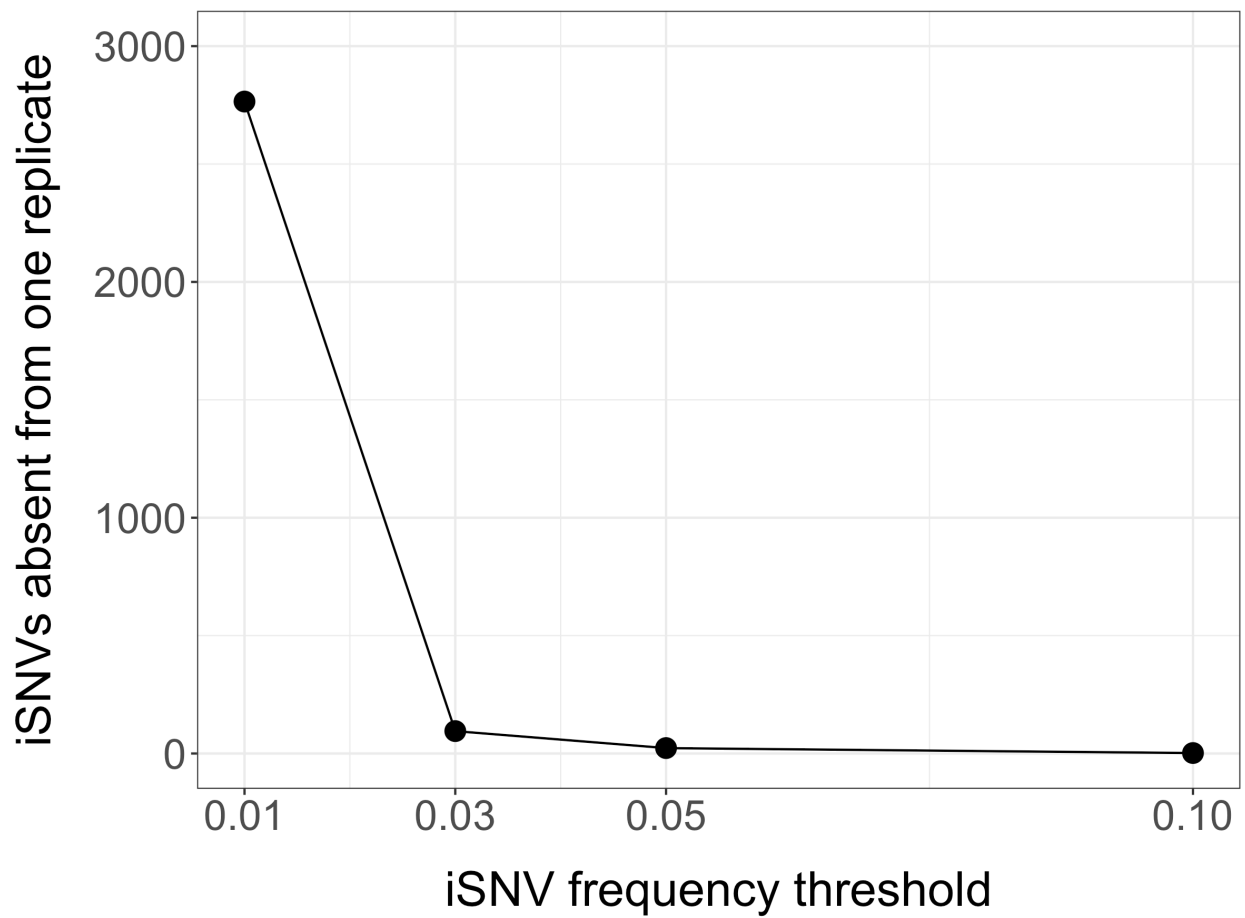

**Supplemental Figure 1. Effect of iSNV frequency cutoff on number of iSNVs absent between technical replicates.** Number of iSNVs present in one technical replicate but absent in the other, with iSNVs called using a range of frequency cutoffs from 0.01 – 0.10. Missing iSNVs were counted using a pooled dataset combining all spike-in dilutions at all Ct values.

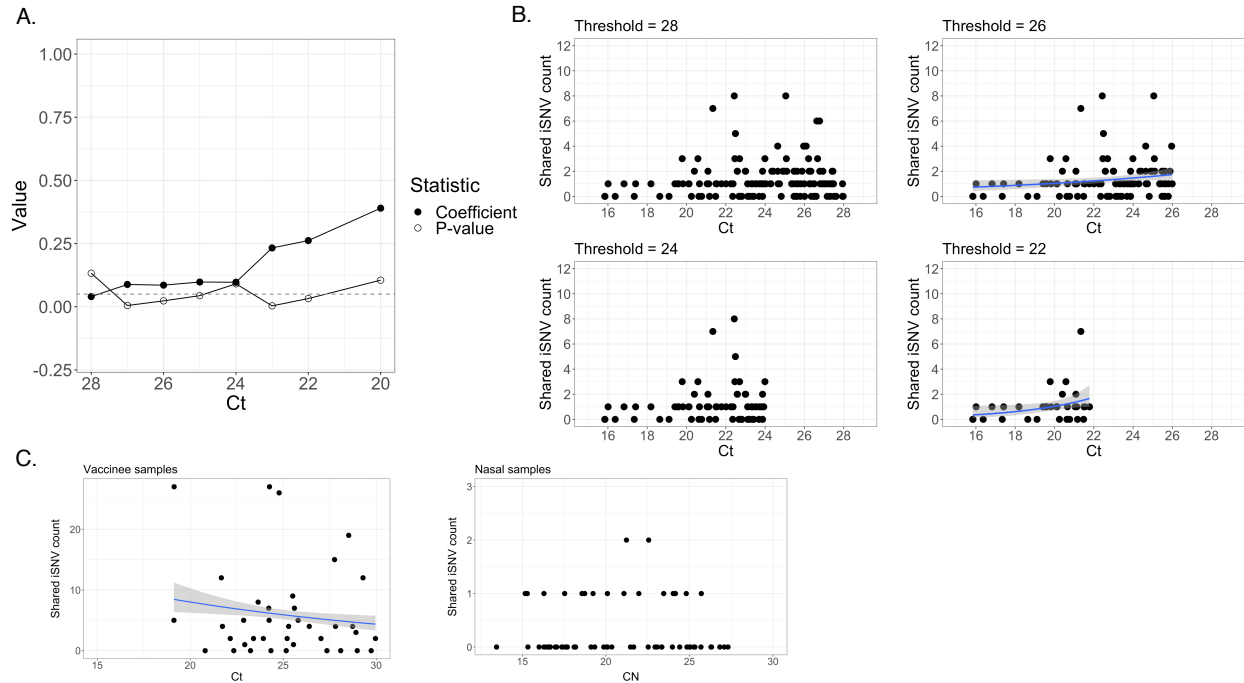

**Supplemental Figure 2. Effect of Ct cutoff thresholds on correlation between Ct and shared iSNVs.** (A) Regression coefficients and P-values for Poisson regressions between Ct and shared iSNV count on datasets with increasingly strict Ct cutoffs. Dashed line indicates  $p = 0.05$ . (B) Plotted comparison of Ct vs. shared iSNV count for Ct < 28 (Poisson regression, reg. coef. = 0.0402,  $p = 0.133$ ), Ct < 26 (reg. coef. = 0.0854,  $p = 0.0233$ ), Ct < 24 (reg. coef. = 0.0970,  $p = 0.909$ ), and Ct < 22 (reg. coef. = 0.262,  $p = 0.0324$ ) datasets. (C) Plotted comparison of Ct vs. shared iSNV count for vaccinee samples (Poisson regression, reg. coef. = -0.0608,  $p = 0.00919$ ). (D) Plotted comparison of CN vs. shared iSNV count for nasal samples (Poisson regression, reg. coef. = -0.0102,  $p = 0.869$ ).

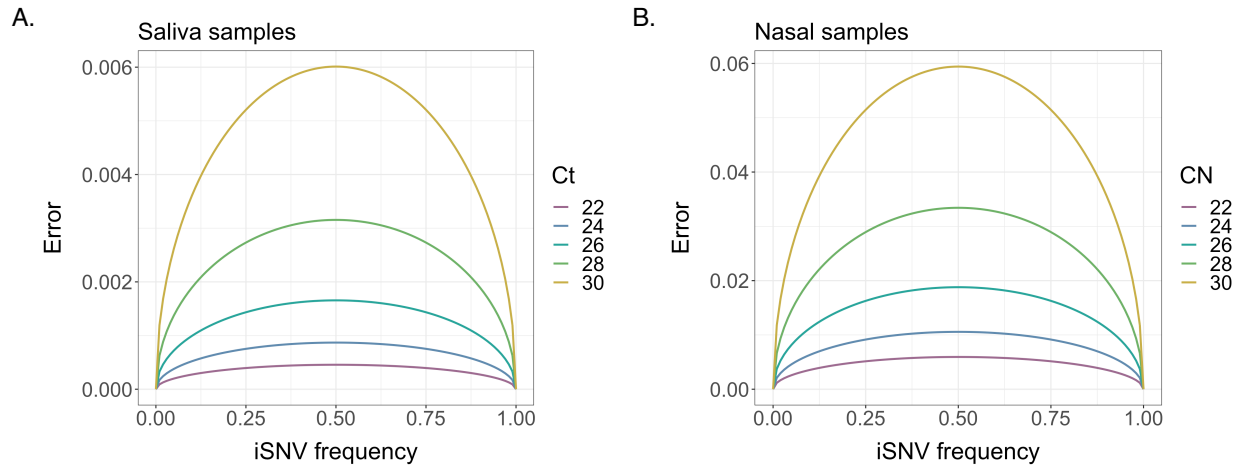

**Supplemental Figure 3. Standard error estimates for saliva and nasal samples. (A)** Error estimates for saliva samples with Ct values ranging from 22 – 30, at frequencies of 0.0 – 1.0. Genome load was estimated based on Ct value, as in Ke et al. 2022<sup>15</sup>. **(B)** Error estimates for nasal samples with CN values ranging from 22 – 30, at frequencies of 0.0 – 1.0. Genome load was estimated based on CN value, as in Ke et al. 2022<sup>15</sup>.

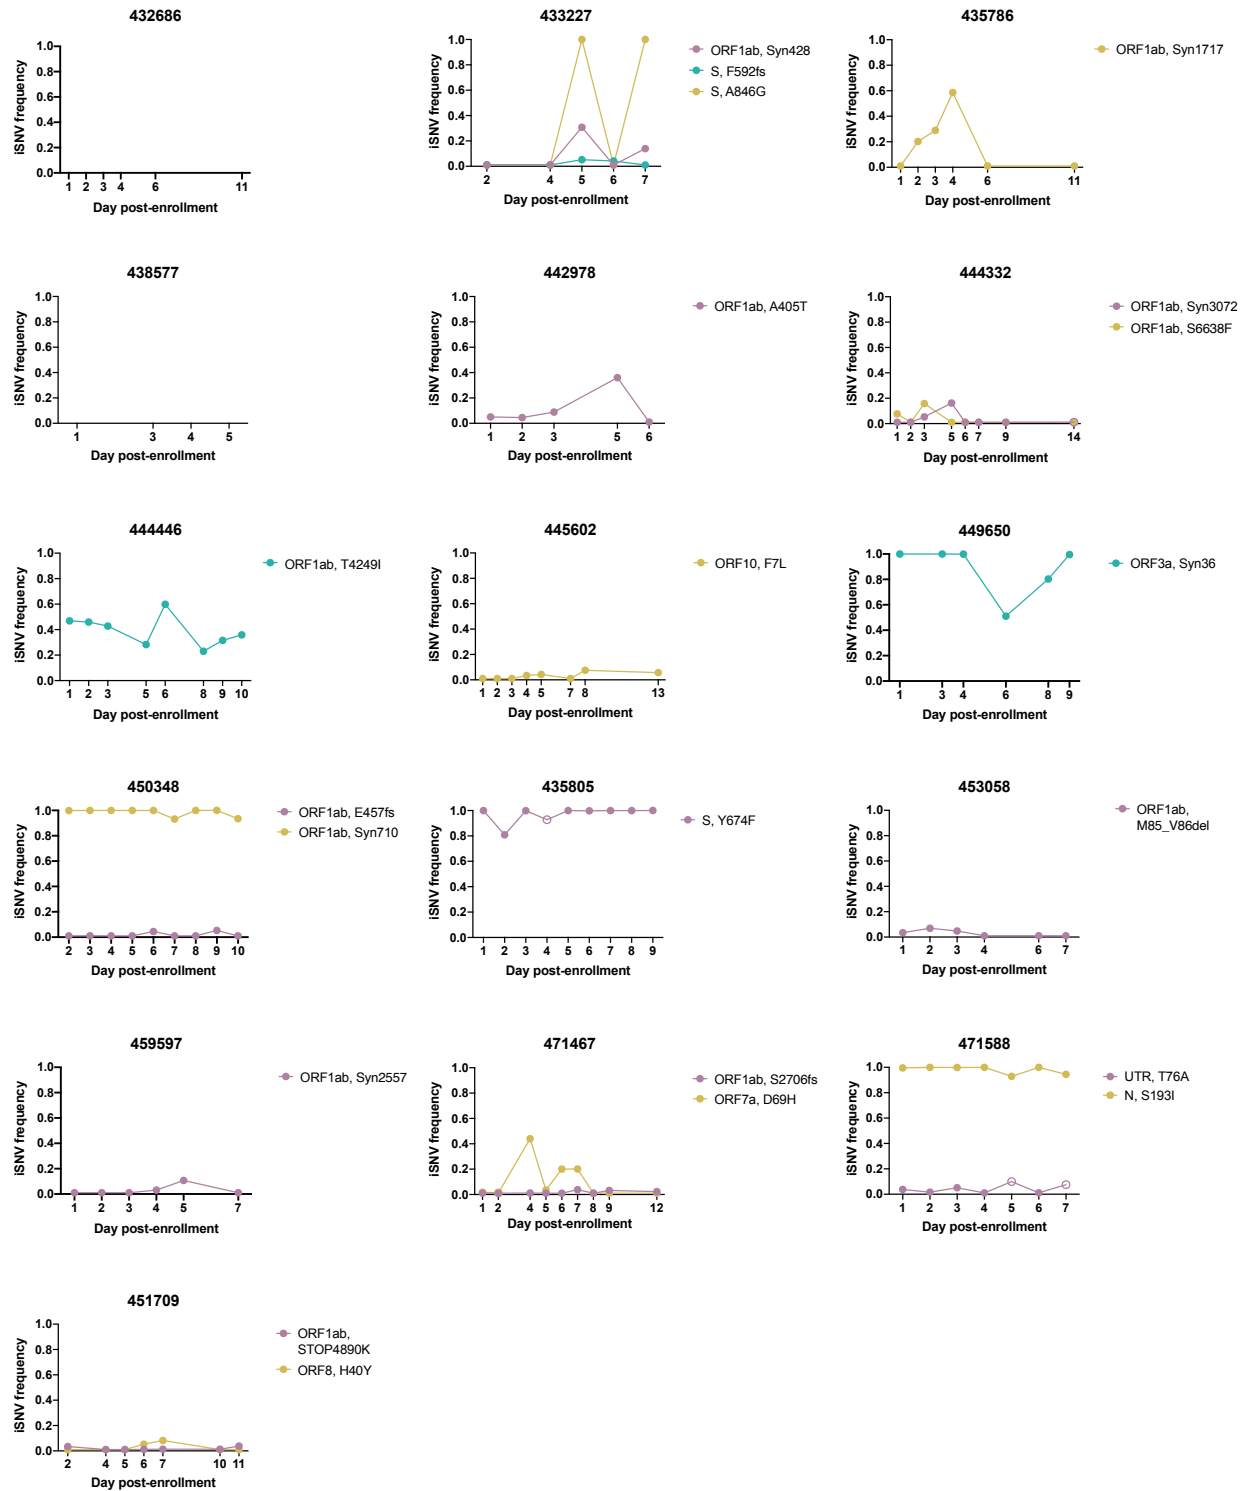

**Supplemental Figure 4. iSNV dynamics over time from additional unvaccinated participants.** Frequency tracking of selected iSNVs in unvaccinated participants. Unfilled points mark iSNVs with read depths below the threshold of 1000 reads.

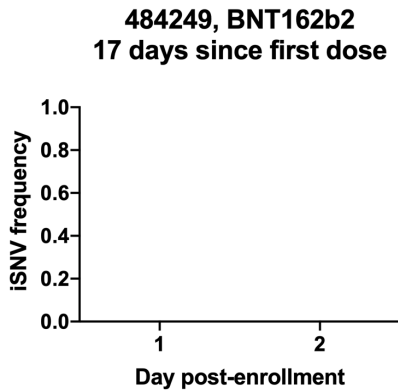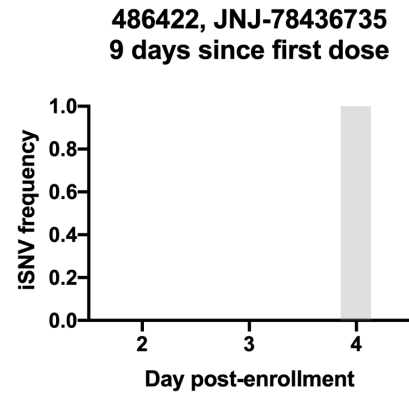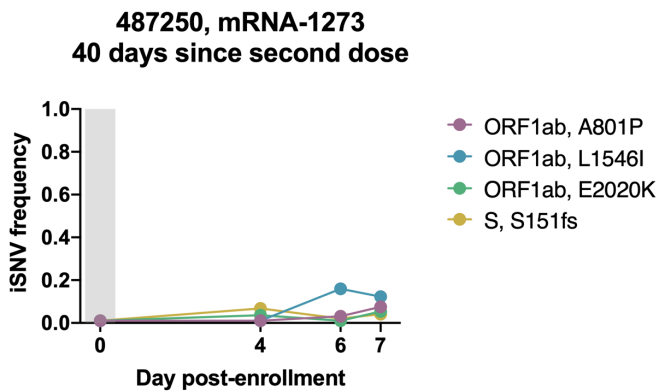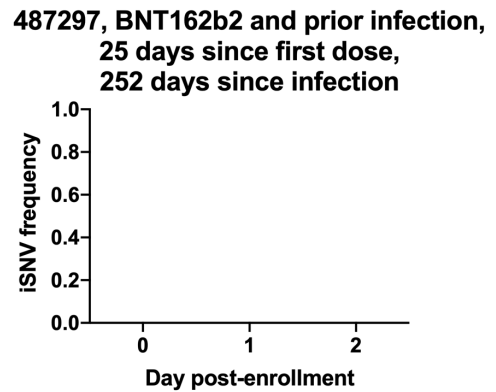

**Supplemental Figure 5. iSNV dynamics over time from additional vaccinated participants.** Frequency tracking of selected iSNVs in vaccinated participants. Unfilled points mark iSNVs with read depths below the threshold of 1000 reads. Gray boxes mark samples with mean per-nucleotide coverages below 1000 reads. Panel headings indicate vaccine received and time between enrollment and last vaccine dose.

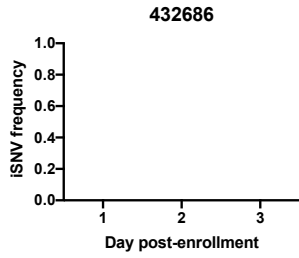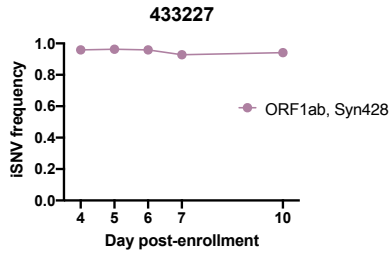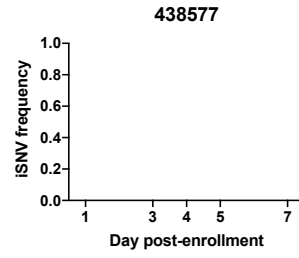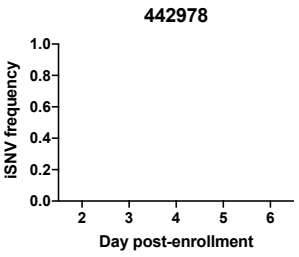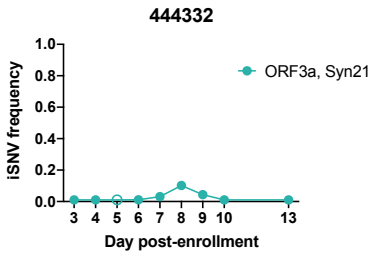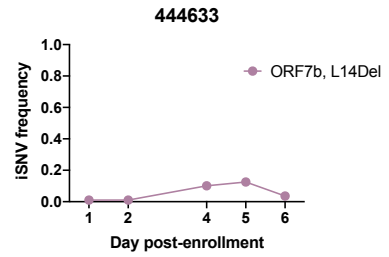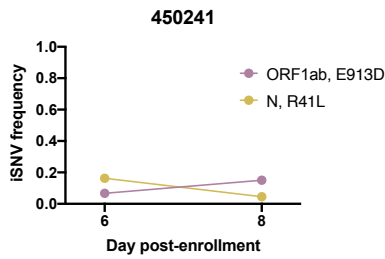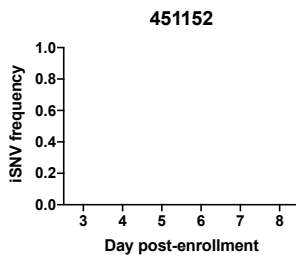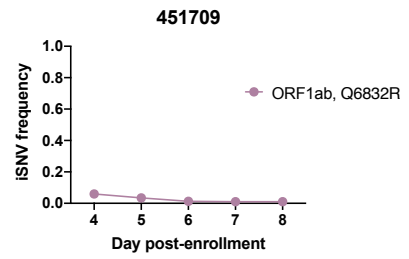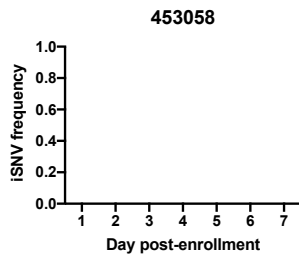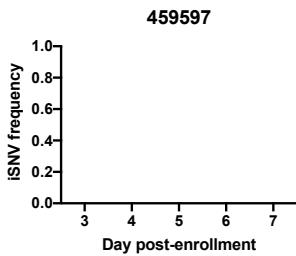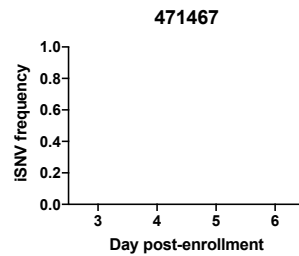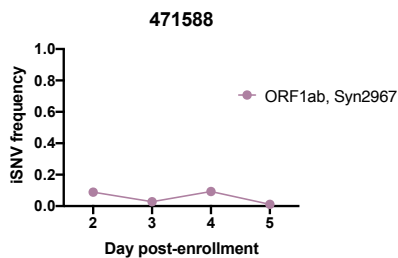

**Supplemental Figure 6. iSNV dynamics over time from all nasal samples.** Frequency tracking of selected iSNVs from nasal swab samples. Unfilled points mark iSNVs with read depths below the threshold of 1000 reads. Gray boxes mark samples with mean per-nucleotide coverages below 1000 reads.

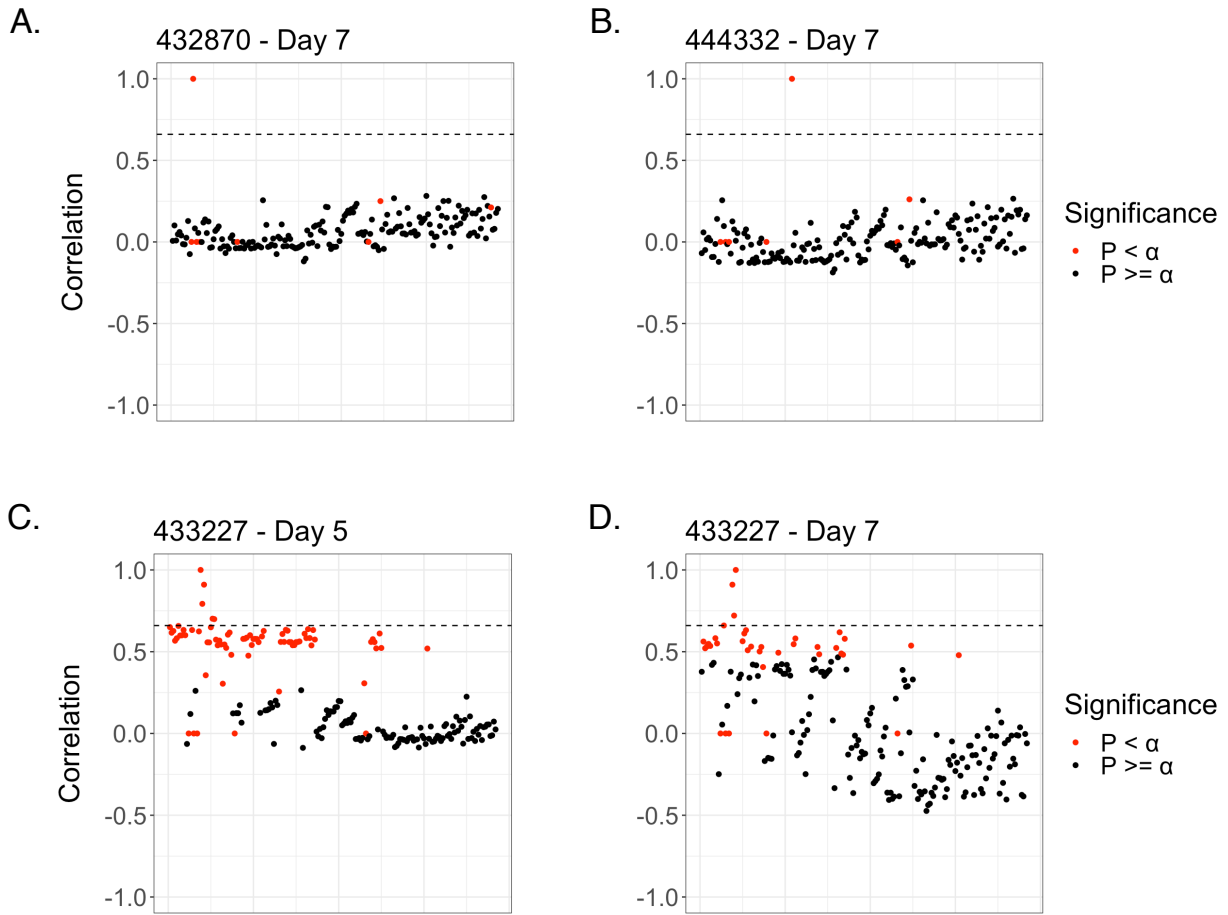

**Supplemental Figure 7. Correlations between samples of interest and all other samples in dataset.** Pearson correlations between samples suspected of contamination and each other sample in the dataset. Dashed line marks threshold of minimum correlation between identical samples, as determined using sequencing replicates.  $\alpha = 0.05/192 \text{ samples} = 0.000260$ .

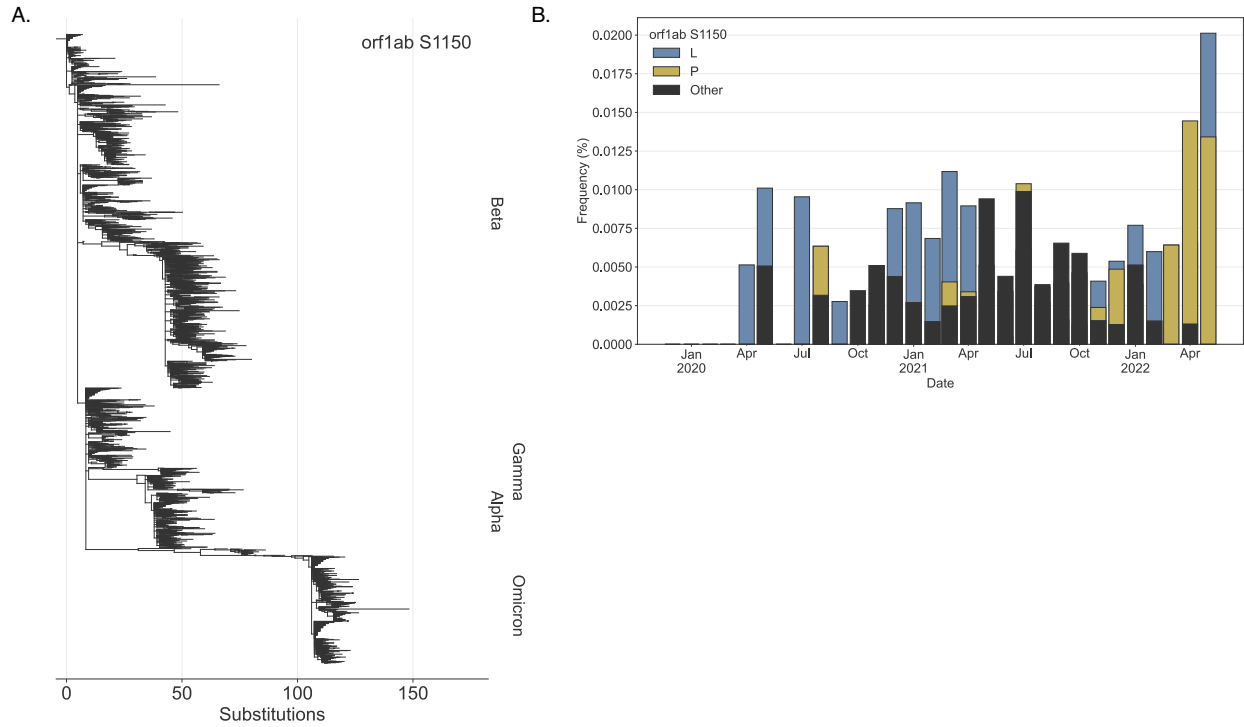

**Supplemental Figure 8. Global occurrence of selected iSNVs. (A)** ORF1ab:S1150-associated amino acid changes plotted on a downsampled (100 sequences per month) global phylogeny of SARS-CoV-2 sequences (no deviations from WT are observed). **(B)** Frequency of ORF1ab:S1150-associated amino acid changes from January 2020 to April 2022 in all quality filtered SARS-CoV-2 sequences.
